# Supplementary material for: Effect of a Passivator Synthesized by Wastes of Iron Tailings and Biomass on the Leachability of Cd/Pb and Safety of Pak Choi (Brassica chinensis L.) in Contaminated Soil
Source: MDPI journal article supplement (doi:10.3390/pr9111866), 2021-10-20
Supplement: s1 [file s1]

Archive with 1 entries (1 files):
- processes-1387285-supplementary.pdf
